# Supplementary material
Source: publisher figshare collection journal article supplement (https://diabetesjournals.figshare.com/ndownloader/files/31119133)
Supplement: Supplementary file 1 [file 31119133]

## Sheet: Checklist for Publications_Diab
Checklist for Reporting Human Islet Preparations Used in Research
Title	The Impact of Pro-Inflammatory Cytokines on Alternative Splicing Patterns in Human Islets
Author list	Wenting Wu1,2, Farooq Syed2,3,4, Edward Simpson5, Chih-Chun Lee2,3,4, Jing Liu6, Garrick Chang6, Chuanpeng Dong5, Clayton Seitz6, Decio L. Eizirik7,8, Raghavendra G. Mirmira9, Yunlong Liu1, Carmella Evans-Molina 2,3,4,10*
Corresponding author	Carmella Evans-Molina
Email address	cevansmo@iu.edu
Islet Preparation	1	2	3	4	5	6	7	8	9	10	11	12	13	14	15	16	17	18	19	20	21	22
MANDATORY INFORMATION
Unique identifier	SAMN08769390	SAMN08769199	SAMN08769191	SAMN08769188	SAMN08769206	SAMN08769132	SAMN08769129	SAMN08769121	SAMN08769124	SAMN08769073	SAMN09862214	SAMN09666985	SAMN09767462	SAMN09767131	SAMN09704507	SAMN08769076	SAMN16706663	SAMN16871526	SAMN17098146	SAMN17277513	SAMN17367763	SAMN16885745
Donor Age (years)	33.0	43.0	35.0	30.0	52.0	23.0	44.0	28.0	15.0	28.0	31.0	49.0	44.0	29.0	61.0	39.0	24	62	57	43	56	67
Donor Sex (M/F)	F	F	M	M	F	M	F	M	M	M	M	M	M	F	F	M	M	M	M	F	M	M
Donor BMI (kg/m2)	34.2	29.5	24.2	35.9	25.9	24.8	34.5	24.6	24.6	30.7	31.8	30.3	29.9	24.1	28.9	23.7	24.3	21.0	24.6	36.5	33.0	24.5
Donor HbA1c	5.5	5.7	5.4	5.4	5.6	5.3	Unknown	5.1	5.1	4.9	5.3	5.8	5.4	4.3	5.2	4.5	4.9	5.3	5.9	5.2	5.3	4.9
Origin/source of islets	IIDP	IIDP	IIDP	IIDP	IIDP	IIDP	IIDP	IIDP	IIDP	IIDP	IIDP	IIDP	IIDP	IIDP	IIDP	IIDP	IIDP	IIDP	IIDP	IIDP	IIDP	ADI islet core
Islet isolation centera	University of Wisconsin	Southern California Islet Cell Resource Center	The Scharp-Lacy Research Institute	The Scharp-Lacy Research Institute	University of Miami	The Scharp-Lacy Research Institute	University of Pennsylvania	University of Pennsylvania	Southern California Islet Cell Resource Center	The Scharp-Lacy Research Institute	Southern California Islet Cell Resource Center	The Scharp-Lacy Research Institute	University of Wisconsin	Southern California Islet Cell Resource Center	The Scharp-Lacy Research Institute	The Scharp-Lacy Research Institute	Southern California Islet Cell Resource Center	The Scharp-Lacy Research Institute	Southern California Islet Cell Resource Center	Southern California Islet Cell Resource Center	The Scharp-Lacy Research Institute	University of Alberta
Donor history of diabetes? Yes/No	No	No	No	No	No	No	No	No	No	No	No	No	No	No	No	No	No	No	No	No	No	No
If Yes, complete the next two lines if this information is available
Diabetes duration (years)	Not Applicable	Not Applicable	Not Applicable	Not Applicable	Not Applicable	Not Applicable	Not Applicable	Not Applicable	Not Applicable	Not Applicable	Not Applicable	Not Applicable	Not Applicable	Not Applicable	Not Applicable	Not Applicable	Not Applicable	Not Applicable	Not Applicable	Not Applicable	Not Applicable	Not Applicable
Glucose-lowering therapy at time of deathb	Not Applicable	Not Applicable	Not Applicable	Not Applicable	Not Applicable	Not Applicable	Not Applicable	Not Applicable	Not Applicable	Not Applicable	Not Applicable	Not Applicable	Not Applicable	Not Applicable	Not Applicable	Not Applicable	Not Applicable	Not Applicable	Not Applicable	Not Applicable	Not Applicable	Not Applicable
RECOMMENDED INFORMATION
Cause of death	Cerebrovascular/stroke	Cerebrovascular/stroke	Head trauma	Cerebrovascular/stroke	Cerebrovascular/stroke	Anoxia	Cerebrovascular/stroke	Head trauma	Head trauma	Cerebrovascular/stroke	Head trauma	Anoxia	Head trauma	Cerebrovascular/stroke	Head trauma	Cerebrovascular/stroke	Head trauma	Cerebrovascular/stroke	Cerebrovascular/stroke	Cerebrovascular/stroke	Head trauma	NDD - Neurological
Warm ischemia time (h)	Not Reported	0.0	Not Reported	Not Reported	Not Reported	Not Reported	Not Reported	Not Reported	Not Reported	0.1	Not Reported	Not Reported	Not Reported	Not Reported	Not Reported	Not Reported	0.1	Not Reported	0.4	0.4	0.7	N/A
Cold ischemia time (h)	14.3	Not Documented	7.4	11.6	6.3	8.2	8.4	13.4	Not Documented	7.4	5.5	11.2	12.5	7.0	6.2	6.2	13.1	9.7	8.1	5.3	10.9	17
Estimated purity (%) By islet isolation center at time of shipment with Dithizone (DTZ) staining per IIDP SOP	95	80	95	90	90	95	90	95	80	95	80	85	90	80	85	90	80	90	85	90	90	95
Estimated viability (%) By islet isolation center at time of broadcast with Fluorescence Diacetate/Propidium Iodide (FDA/PI) staining per IIDP SOP	98	97	95	95	95	95	90	91	97	95	95	95	95	96	95	95	96	95	98	96	95	90
Total culture time(h)c Calculate[start date/time of experiment]-[date/ time islet culture began (below)]	48	48	48	48	48	48	48	48	48	48	48	48	48	48	48	48	48	48	48	48	48	82
Date/Time Islet Culture Began at islet isolation center (Pacific Standard Time, 24-hour format)	2016-05-29 18:22	2016-06-30 15:00	2016-07-15 16:45	2016-07-24 18:35	2016-08-11 06:50	2016-09-08 18:34	2016-09-20 10:00	2016-10-06 15:00	2016-09-30 11:00	2016-11-03 17:15	2018-08-19 15:00	2018-07-15 11:47	2018-08-05 22:30	2018-08-03 16:40	2018-07-19 15:33	2016-10-26 16:11	2020-11-07 01:00	2020-11-20 04:00	2020-12-16 13:20	2021-01-10 02:00	2021-01-15 14:30	2020-11-22
Glucose-stimulated insulin secretion or other functional measurementd Stimulation Index (SI) by static incubation at islet isolation center pre-shipment per IIDP SOP	SI (G2.8mM-G28mM)= 1.6	SI (G2.8mM-G28mM)= 1.8	SI (G2.8mM-G28mM)= 3.5	SI (G2.8mM-G28mM)= 6.3	SI (G2.8mM-G28mM)= 2.7	SI (G2.8mM-G28mM)= 3.5	SI (G2.8mM-G28mM)= 1.7	SI (G2.8mM-G28mM)= 3.1	SI (G2.8mM-G28mM)= 2.5	SI (G2.8mM-G28mM)= 4.0	SI (G2.8mM-G28mM)= 2.0	SI (G2.8mM-G28mM)= 2.6	SI (G2.8mM-G28mM)= 1.7	SI (G2.8mM-G28mM)= 2.8	SI (G2.8mM-G28mM)= 4.0	SI (G2.8mM-G28mM)= 5.7	SI (G2.8mM-G28mM)= 1.3	SI (G2.8mM-G28mM)= 1.1	SI (G2.8mM-G28mM)= 1.2	SI (G2.8mM-G28mM)= 2.7	SI (G2.8mM-G28mM)= 1.5	SI (G2.8mM-G16.7mM)= 2.31
Glucose-stimulated insulin secretion or other functional measurement Area Under the Curve (AUC) by perifusion at HIPP post shipment sample per HIPP SOP	AUC (G5.6mM-G16.7mM)= Not Available	AUC (G5.6mM-G16.7mM)= 41.1 (ng/100 IEQs)	AUC (G5.6mM-G16.7mM)= Not Available	AUC (G5.6mM-G16.7mM)= Not Available	AUC (G5.6mM-G16.7mM)= Not Available	AUC (G5.6mM-G16.7mM)= 24.8 (ng/100 IEQs)	AUC (G5.6mM-G16.7mM)= Not Available	AUC (G5.6mM-G16.7mM)= Not Available	AUC (G5.6mM-G16.7mM)= 35.1 (ng/100 IEQs)	AUC (G5.6mM-G16.7mM)= 40.4 (ng/100 IEQs)	AUC (G5.6mM-G16.7mM)= 26.0 (ng/100 IEQs)	AUC (G5.6mM-G16.7mM)= 46.3 (ng/100 IEQs)	AUC (G5.6mM-G16.7mM)= 16.4 (ng/100 IEQs)	AUC (G5.6mM-G16.7mM)= 34.3 (ng/100 IEQs)	AUC (G5.6mM-G16.7mM)= 47.0 (ng/100 IEQs)	AUC (G5.6mM-G16.7mM)= 55.7 (ng/100 IEQs)	AUC (G5.6mM-G16.7mM)= 0.0 (ng/100 IEQs)	AUC (G5.6mM-G16.7mM)= 0.0 (ng/100 IEQs)	AUC (G5.6mM-G16.7mM)= 0.0 (ng/100 IEQs)	AUC (G5.6mM-G16.7mM)= 0.0 (ng/100 IEQs)	AUC (G5.6mM-G16.7mM)= 0.0 (ng/100 IEQs)
Handpicked to purity? Yes/No	No	No	No	No	No	No	No	No	No	No	No	No	No	No	No	No	No	No	No	No	No	No
Additional notes	N/A	N/A	N/A	N/A	N/A	N/A	N/A	N/A	N/A	N/A	N/A	N/A	N/A	N/A	N/A	N/A	N/A	N/A	N/A	N/A	N/A	N/A
